# Supplementary material for: Charcot knee — presentation, diagnosis, management — a scoping review
Source: Springer Nature journal article supplement (doi:10.1007/s10067-021-05775-8), 2021-05-24
Supplement: MOESM1 [file 10067_2021_5775_MOESM1_ESM.pdf]

# Charcot Knee - Presentation, Diagnosis, Management - A Scoping Review

Journal Name: **Clinical Rheumatology**

*Victor Lu<sup>†1</sup>, James Zhang<sup>1</sup>, Azeem Thahir<sup>2</sup>, Andrew Zhou<sup>1</sup>, Matija Krkovic<sup>2</sup>*

<sup>1</sup>*School of Clinical Medicine, University of Cambridge, CB2 0SP, United Kingdom*

<sup>2</sup>*Department of Trauma and Orthopaedics, Addenbrooke's Hospital, CB2 0QQ, United Kingdom*

† Corresponding author. Email: [victorluwawa@yahoo.com.hk](mailto:victorluwawa@yahoo.com.hk) Postal address: Christ's College, St. Andrew's Street, Cambridge, CB2 3BU

| <b>Online Resource 1: Search strategy</b> |                |                                                                                                                                                                                                                                                                                                                                                                                                                                                                                                                                                                                                     |                |                                                                                                                                  |                |
|-------------------------------------------|----------------|-----------------------------------------------------------------------------------------------------------------------------------------------------------------------------------------------------------------------------------------------------------------------------------------------------------------------------------------------------------------------------------------------------------------------------------------------------------------------------------------------------------------------------------------------------------------------------------------------------|----------------|----------------------------------------------------------------------------------------------------------------------------------|----------------|
| <b>Embase via OVID</b>                    |                | <b>Medline via PubMed</b>                                                                                                                                                                                                                                                                                                                                                                                                                                                                                                                                                                           |                | <b>Web of Science</b>                                                                                                            |                |
| <u>Search term</u>                        | <u>Results</u> | <u>Search term</u>                                                                                                                                                                                                                                                                                                                                                                                                                                                                                                                                                                                  | <u>Results</u> | <u>Search term</u>                                                                                                               | <u>Results</u> |
| 1. charcot.mp                             | 10503          | (("charcot"[All Fields] OR "charcot s"[All Fields] OR "charcots"[All Fields] OR "arthropathy, neurogenic"[MeSH Terms]) AND ("joint diseases"[MeSH Terms] OR ("joint"[All Fields] AND "diseases"[All Fields]) OR "joint diseases"[All Fields] OR "arthropathies"[All Fields] OR "arthropathy"[All Fields] OR ("osteoarthropathies"[All Fields] OR "osteoarthropathy"[All Fields]) OR "neuropath*"[All Fields]) AND ("knee"[MeSH Terms] OR "knee"[All Fields] OR "knee joint"[MeSH Terms] OR ("knee"[All Fields] AND "joint"[All Fields]) OR "knee joint"[All Fields])) NOT "Marie-Tooth"[All Fields] | <b>249</b>     | (((charcot) AND ((neurogenic arthropathy) OR (arthropath*) OR (osteoarthropath*) OR (neuropath*)) AND (knee) NOT (Marie-Tooth))) | <b>93</b>      |
| 2. neuropath*.mp                          | 330837         |                                                                                                                                                                                                                                                                                                                                                                                                                                                                                                                                                                                                     |                |                                                                                                                                  |                |
| 3. knee.mp                                | 240548         |                                                                                                                                                                                                                                                                                                                                                                                                                                                                                                                                                                                                     |                |                                                                                                                                  |                |
| 4. marie-tooth.mp                         | 7062           |                                                                                                                                                                                                                                                                                                                                                                                                                                                                                                                                                                                                     |                |                                                                                                                                  |                |
| 5. arthropath*.mp                         | 33410          |                                                                                                                                                                                                                                                                                                                                                                                                                                                                                                                                                                                                     |                |                                                                                                                                  |                |
| 6. osteoarthropath*.mp                    | 4291           |                                                                                                                                                                                                                                                                                                                                                                                                                                                                                                                                                                                                     |                |                                                                                                                                  |                |
| 7. "neurogenic arthropathy*".mp           | 56             |                                                                                                                                                                                                                                                                                                                                                                                                                                                                                                                                                                                                     |                |                                                                                                                                  |                |
| 2 or 5 or 6 or 7                          | 365845         |                                                                                                                                                                                                                                                                                                                                                                                                                                                                                                                                                                                                     |                |                                                                                                                                  |                |
| 1 or 3 or 8                               | 309            |                                                                                                                                                                                                                                                                                                                                                                                                                                                                                                                                                                                                     |                |                                                                                                                                  |                |
| 9 not 4                                   | <b>171</b>     |                                                                                                                                                                                                                                                                                                                                                                                                                                                                                                                                                                                                     |                |                                                                                                                                  |                |
